# Correction: Biogenesis and activity regulation of protein phosphatase 1

Iris Verbinnen, Monica Ferreira and Mathieu Bollen

Volume 45 (1), pages 89–99

Owing to an error that occurred during the production process, Figures 2 and 5 in this article were published in greyscale in the print version. The online version is not affected. The colour versions of the figures are presented here.

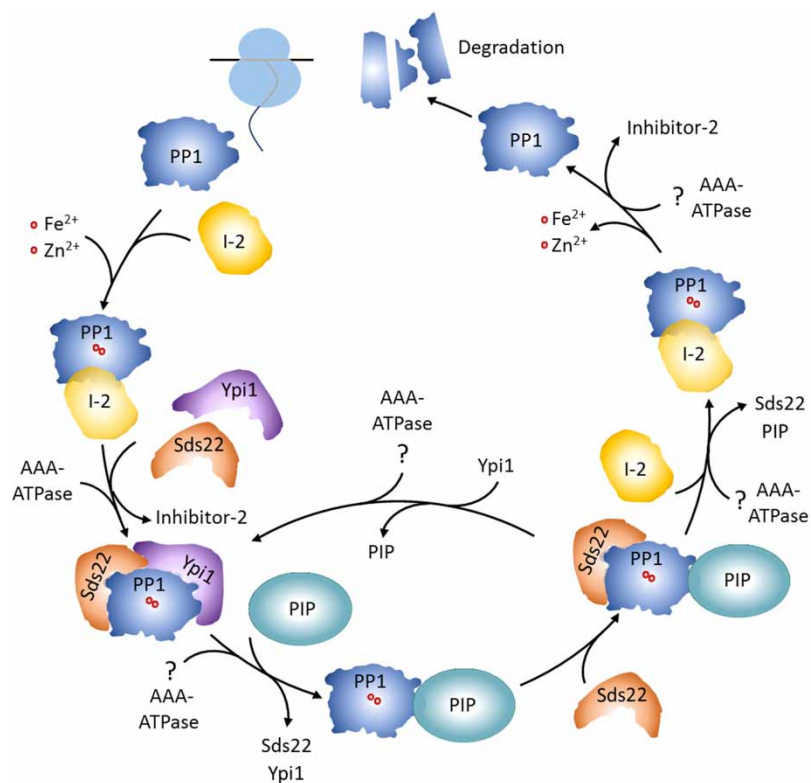

**Figure 2. The hypothetical life cycle of PP1.**

During or shortly after the translation of PP1, the metals  $\text{Fe}^{2+}$  and  $\text{Zn}^{2+}$  are incorporated into the active site by a mechanism that probably involves the transient phosphorylation of Inhibitor-2 by protein kinase GSK-3. Subsequently, PP1 is extracted by an AAA-type ATPase (Cdc48 and the cofactor Shp1 in yeast) to form a soluble, inhibited trimeric complex with Sds22 and Ypi1 (Inhibitor-3 in vertebrates). This complex serves as the source of PP1 for the assembly of PP1 holoenzymes. At least some PP1 holoenzymes can recruit Sds22 as a third subunit. It is suggested that Sds22 mediates the recruitment of an AAA-ATPase to extract PP1 from these holoenzymes, either for (phosphorylation-independent) metal unloading by Inhibitor-2 and its subsequent proteolytic degradation or for recycling to form a trimeric complex with Sds22 and Ypi1/Inhibitor-3.

Correction published:  
 13 April 2017

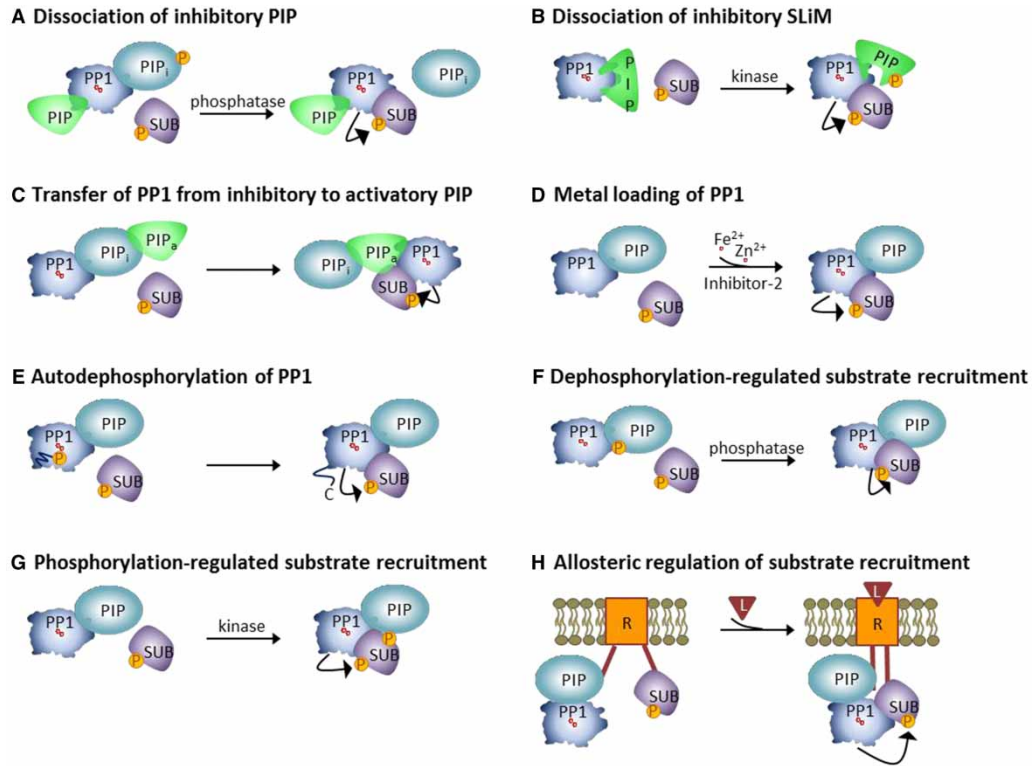

**Figure 5. Activation mechanisms of PP1 holoenzymes.**

Different modes of PP1 holoenzyme activation are depicted. **(A)** Dephosphorylation of an inhibitory PIP causes its dissociation and activation of a PP1 holoenzyme. **(B)** Phosphorylation-dependent dissociation of an inhibitory SLiM activates a PP1 complex. **(C)** A PP1 holoenzyme can be activated by transfer of PP1 from an inhibitory to an activatory PIP. **(D and E)** Targeting of the catalytic subunit of PP1 itself can modulate activation, for example, by metal loading of PP1 **(D)** or by autodephosphorylation of an inhibitory site in the C-terminus of PP1 **(E)**. **(F)** The phosphorylation state of PIPs determines their binding affinity for substrates. **(G)** Substrate recruitment can depend on its prior phosphorylation state. **(H)** Ligand binding to a receptor complex can induce conformational changes that bring PP1 within reach of its substrate. P, phosphorylation; SUB, substrate; i, inhibitory; a, activatory; R, receptor; L, ligand.
